# Supplementary material for: Unraveling the conversion mechanism toward spinel sulfides as cathode materials for Mg-ion batteries
Source: Royal Society of Chemistry journal article supplement (doi:10.1039/d4cp03948c), 2025-01-01
Supplement: d4cp03948c1.pdf [file d4cp03948c1.pdf]

## Supplementary Material

### Unraveling conversion mechanism toward spinel sulfides as cathode materials for Mg-ion batteries

Jinming Pan<sup>1</sup>, Danmei Gao<sup>1</sup>, Jianxian Qiao<sup>4</sup>, Yuping Liu<sup>1,2\*</sup>, Jing Xu<sup>3\*</sup>, Bo Shang<sup>1</sup>, Changguo Chen<sup>1\*</sup>, Guangsheng Huang<sup>2</sup>,  
Dingfei Zhang<sup>2</sup>, Fusheng Pan<sup>2</sup>

1. College of Chemistry and Chemical Engineering, Chongqing University, Chongqing 401331, PR China
2. National Engineering Research Centre for Mg Alloys, Chongqing University, Chongqing, 400044, PR China
3. College of Chemistry and Chemical Engineering, Xinyang Normal University, Xinyang 464000, PR China
4. Basic Department, Army Logistics Academy of PLA, Chongqing 401311, PR China

#### Corresponding Authors.

**Yuping Liu:** liuyuping@cqu.edu.cn; **Jing Xu:** xujing@xynu.edu.cn; **Changguo Chen:** cgchen@cqu.edu.cn

#### Computational formula

The formation energies of magnesiated  $M_3S_4$  at various Mg concentrations are expressed as equ (S1):

$$E_f = \frac{(E_{Mg_xM_3S_4} - E_{M_3S_4} - nE_{Mg})}{n} (M = Co / Ni) \quad \text{equ (S1)}$$

$E_{Mg_xM_3S_4}$ ,  $E_{M_3S_4}$ ,  $E_{Mg}$  refer to the total energies of  $Mg_xM_3S_4$ ,  $M_3S_4$ , and Mg, n represents the Mg ion concentration in the unit cell of  $M_3S_4$  ( $0 \leq x \leq 2$ ).

The voltage of the most stable  $Mg_xM_3S_4$  configuration was calculated from first principles. The electrochemical reaction of battery discharge is shown in equ (S2):

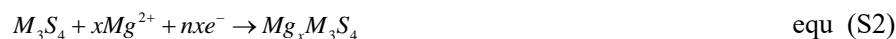

The average voltage depends on the change of Gibbs free energy of the electrode. At the same time, because  $p\Delta V$  and  $T\Delta S$  are too small to be negligible, the value of internal energy ( $\Delta E$ ) can represent the Gibbs free energy.

$$V = -[E_{Mg_{x_2}M_3S_4} - E_{Mg_{x_1}M_3S_4} - (x_2 - x_1)E_{Mg}] / (x_2 - x_1)z \quad \text{equ (S3)}$$

$E_{Mg_{x_2}M_3S_4}$ ,  $E_{Mg_{x_1}M_3S_4}$ ,  $E_{Mg}$  represent the total energies of  $Mg_{x_2}M_3S_4$ ,  $Mg_{x_1}M_3S_4$ , and each atom in metal Mg, x represents the number of metal ions Mg embedded in  $M_3S_4$  ( $0 \leq x_1, 0 \leq x_2 \leq 2$ ), z is the charge transfer coefficient ( $z = 2$  for Mg).

In order to expound the conversion mechanism, Ab initio molecular dynamics (AIMD) calculations were conducted in a

cubic  $2 \times 2 \times 2$  supercell. The annealing process was performed at 300 K in a canonical ensemble for 2 ps with a time step of 1 fs. The local atomic arrangements in  $Mg_xM_3S_4$  ( $0 \leq x \leq 2$ ) can be characterized by the partial pair correlation function (PCF), in which  $g_{AB}(r)$  represents the average number of B atoms for one species around A atoms for another species with the distance of r. Quantitatively,  $g_{AB}(r)$  is calculated by equ (S4):

$$g_{AB}(r) = \frac{L^3}{N_A N_B} \frac{\sum_{A,B}^{N_A, N_B} n_{AB}(r)}{4\pi r^2 dr} \quad \text{equ (S4)}$$

where L is the length of the cubic unit cell,  $N_A$  and  $N_B$  are the numbers of A- and B-type atoms in the unit cell, respectively, and  $n_{AB}$  is the average number of B atoms around A atoms in the spherical shell of r - (r + dr).

# Figure

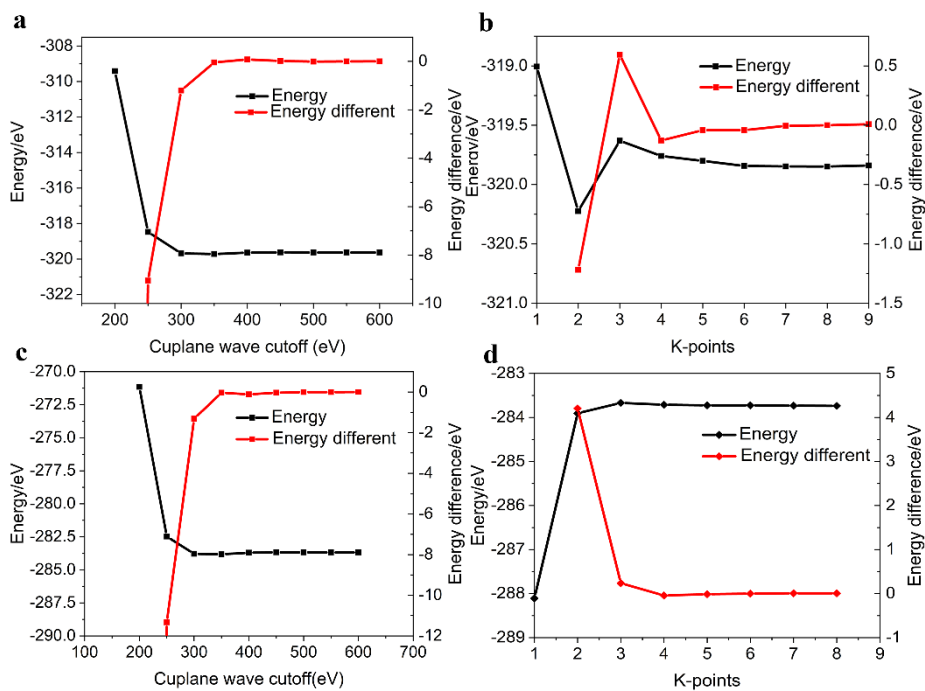

**Fig. S1** (a) Relationship between different cutoff energies and energy of  $\text{Co}_3\text{S}_4$ , (b) Relationship between different K-points and energy of  $\text{Co}_3\text{S}_4$  (c) Relationship between different cut-off energies and energy of  $\text{Ni}_3\text{S}_4$ , (d) Relationship between different K-points and energy of  $\text{Ni}_3\text{S}_4$ .

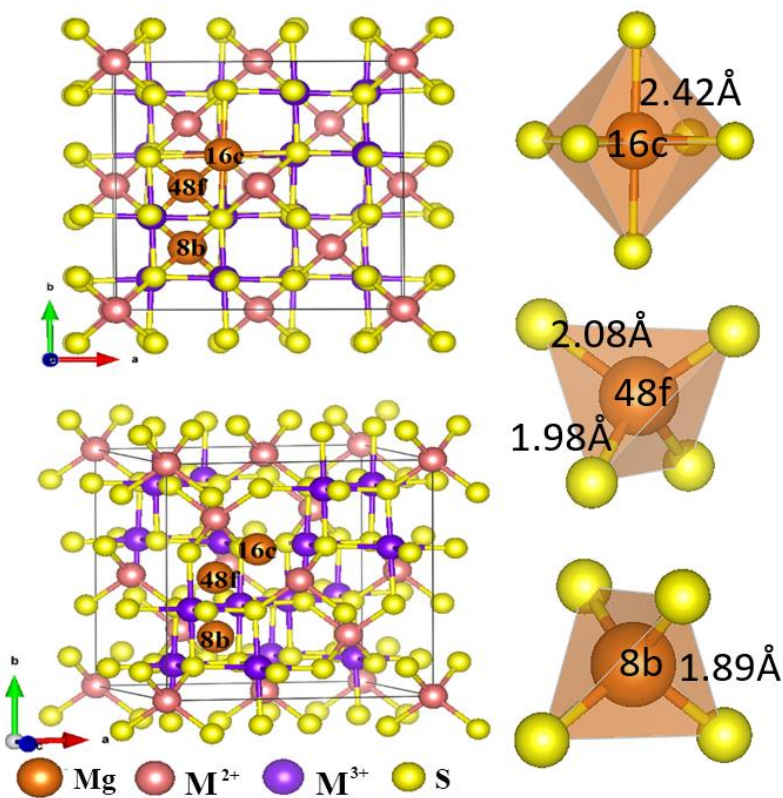

**Fig. S2** Interstitial sites of  $\text{M}_3\text{S}_4$  crystal.

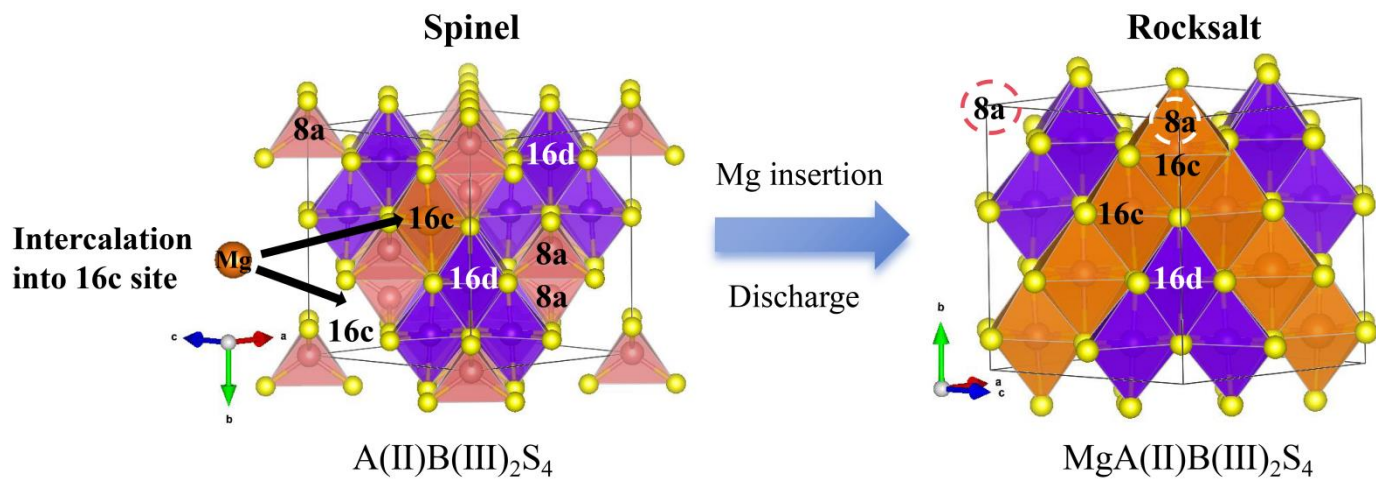

**Fig. S3** Transformation of spinel phase to rock salt phase during the magnesianation.

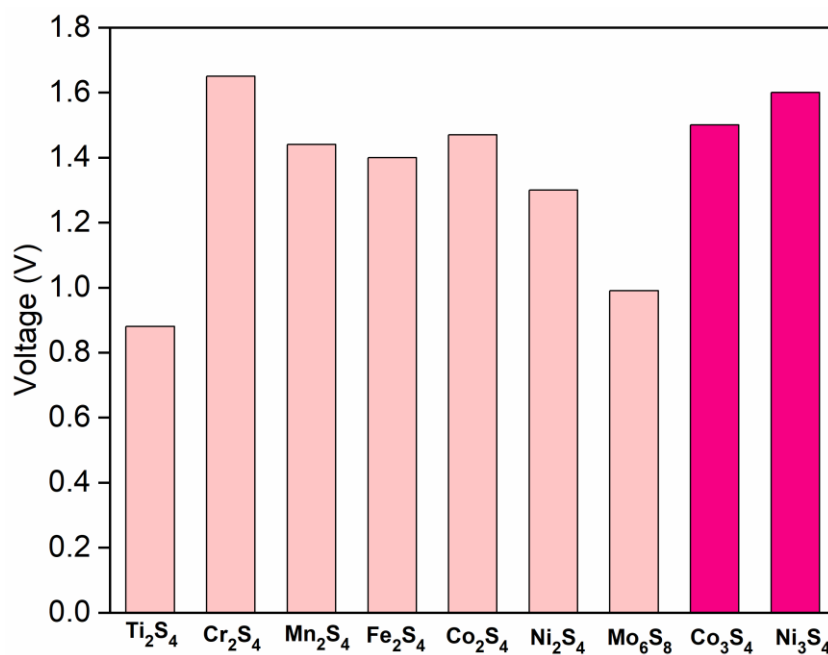

**Fig. S4** Comparison between the discharge voltages of the spinel sulfides and other transition metal sulfides as cathode materials for Mg batteries.

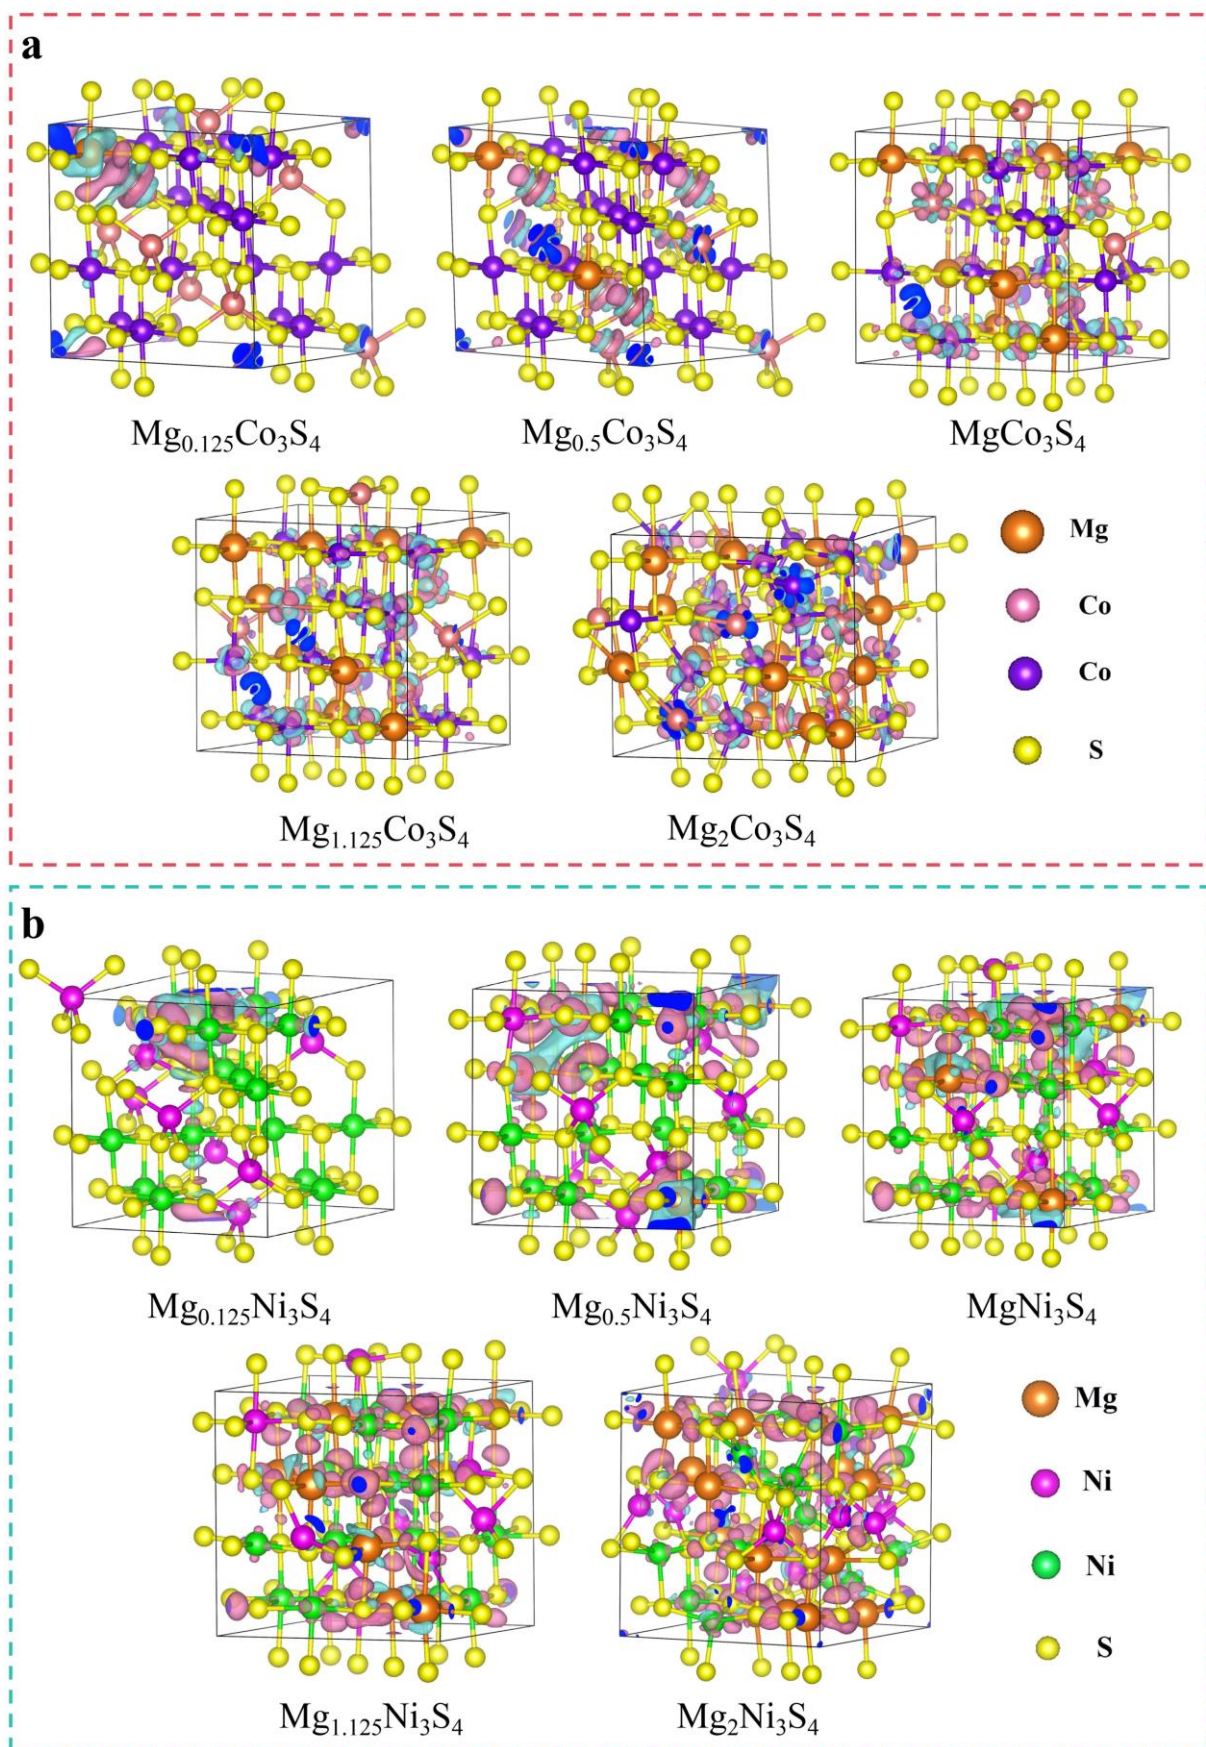

**Fig. S5** Differential charge densities of (a)  $Mg_xCo_3S_4$  and (b)  $Mg_xNi_3S_4$  at. Pink (blue) is the spatial regions gain (loss) in charge.

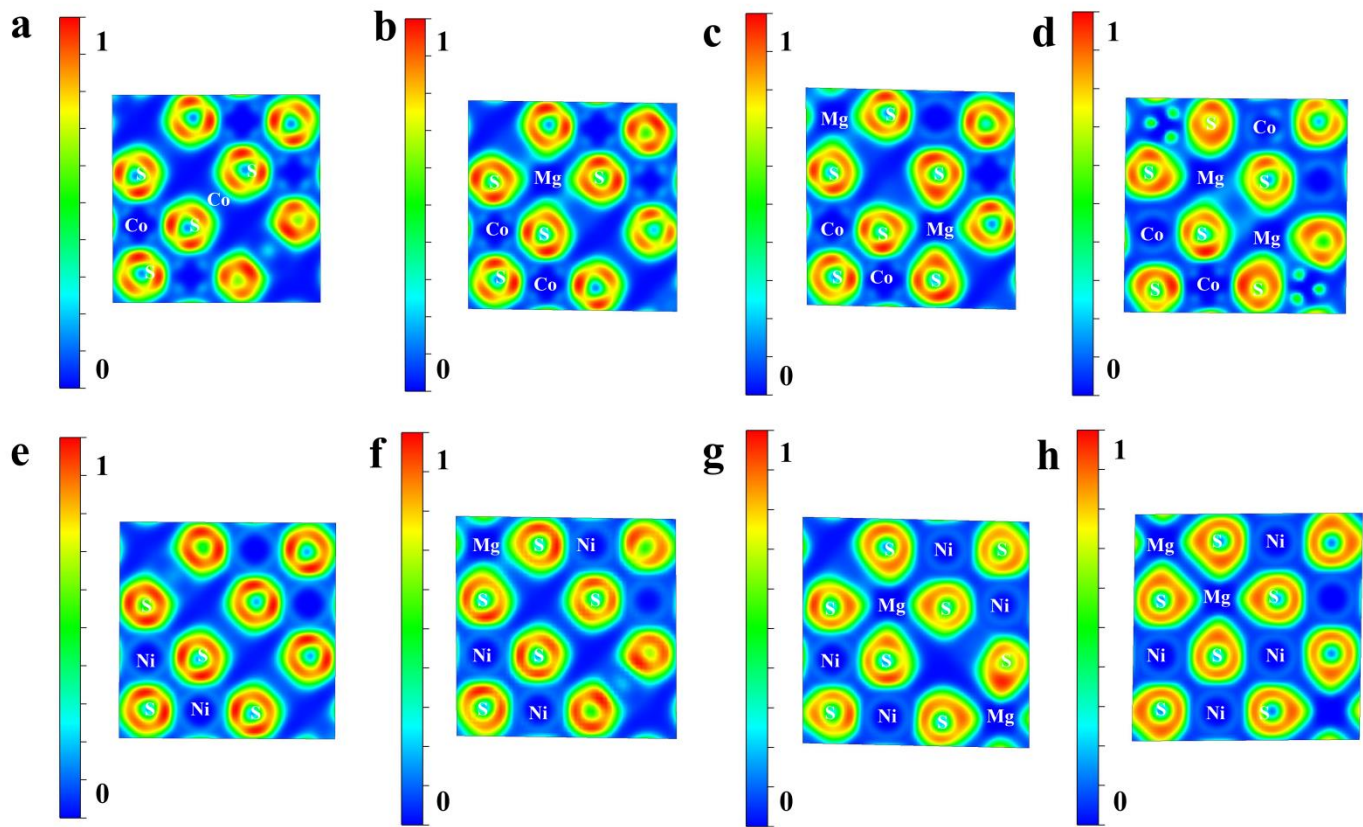

**Fig. S6** Electronic localization function (ELF) diagrams of (a)  $\text{Co}_3\text{S}_4$ , (b)  $\text{Mg}_{0.125}\text{Co}_3\text{S}_4$ , (c)  $\text{Mg}_{0.625}\text{Co}_3\text{S}_4$ , (d)  $\text{MgCo}_3\text{S}_4$  and (e)  $\text{Ni}_3\text{S}_4$ , (f)  $\text{Mg}_{0.125}\text{Ni}_3\text{S}_4$ , (g)  $\text{Mg}_{0.625}\text{Ni}_3\text{S}_4$ , (h)  $\text{MgNi}_3\text{S}_4$ .

## Tables

**Table S1** Lattice parameters of Ni<sub>3</sub>S<sub>4</sub> before and after structural optimization.

| Ni <sub>3</sub> S <sub>4</sub> | a(Å)   | b(Å)   | c(Å)   | $\alpha$ | $\beta$ | $\gamma$ | V(Å <sup>3</sup> ) |
|--------------------------------|--------|--------|--------|----------|---------|----------|--------------------|
| <b>Experiment values</b>       | 9.457  | 9.457  | 9.457  | 90°      | 90°     | 90°      | 845.78             |
| <b>Optimized values</b>        | 9.330  | 9.330  | 9.330  | 90°      | 90°     | 90°      | 812.29             |
| <b>E<sub>r</sub></b>           | -1.34% | -1.34% | -1.34% | 0%       | 0%      | 0%       | -3.96%             |

**Table S2** Lattice parameters of Co<sub>3</sub>S<sub>4</sub> before and after structural optimization.

| Co <sub>3</sub> S <sub>4</sub> | a(Å)  | b(Å)  | c(Å)  | $\alpha$ | $\beta$ | $\gamma$ | V(Å <sup>3</sup> ) |
|--------------------------------|-------|-------|-------|----------|---------|----------|--------------------|
| <b>Experiment values</b>       | 9.401 | 9.401 | 9.401 | 90°      | 90°     | 90°      | 830.85             |
| <b>Optimized values</b>        | 9.501 | 9.501 | 9.501 | 90°      | 90°     | 90°      | 857.844            |
| <b>E<sub>r</sub></b>           | 1.06% | 1.06% | 1.06% | 0.00%    | 0.00%   | 0.00%    | 3.2%               |

**Table S3** Wyckoff sites of M<sub>3</sub>S<sub>4</sub>

| Elements  | Wyckoff sites | Fractional coordinates (x, y, z) |
|-----------|---------------|----------------------------------|
| <b>M1</b> | <i>8a</i>     | (0, 0, 0)                        |
| <b>M2</b> | <i>16d</i>    | (0.625, 0.625, 0.625)            |
| <b>S</b>  | <i>32e</i>    | (-0.135, -0.135, -0.135)         |

**Table S4** Energies and volumetric expansion ratio of Mg<sub>0.125</sub>Co<sub>3</sub>S<sub>4</sub> at different interstitials sites

| Interstitials sites | Energies/eV | Volumetric expansion ratio/% |
|---------------------|-------------|------------------------------|
| <i>16c</i>          | -272.99178  | 0.76%                        |
| <i>48f</i>          | -271.53713  | 2.16%                        |
| <i>8b</i>           | -268.06943  | 4.11%                        |

**Table S5** Energies and volumetric expansion ratio of Mg<sub>0.125</sub>Ni<sub>3</sub>S<sub>4</sub> at different interstitials sites.

| Interstitials sites | Energies/eV   | Volumetric expansion ratio/% |
|---------------------|---------------|------------------------------|
| <i>16c</i>          | -239.56708 eV | 6.82%                        |
| <i>48f</i>          | -238.68149 eV | 7.20%                        |
| <i>8b</i>           | -235.34990 eV | 7.93%                        |

It can be calculated from Table S3 that the formation energies of 16c, 48f, and 8b vacancies are -1.08 eV, -0.38 eV, and 3.85 eV, respectively. From Table S4, the formation energies of 16c, 48f, and 8b vacancies are calculated to be -2.06 eV, -1.17 eV, 2.16 eV, respectively. The three configurations are stable after structural relaxation, but they all have the lowest formation energy at the 16c site and have the most stable structure, so Mg<sup>2+</sup> is preferentially embedded in the octahedral 16c site.

**Table S6** Energies, Formation energy and Volumetric expansion ratios of Mg<sub>x</sub>Co<sub>3</sub>S<sub>4</sub> at different Mg concentrations.

| Molecular formula                                  | Energies (eV) | Formation energies (eV) | Volumetric expansion ratios |
|----------------------------------------------------|---------------|-------------------------|-----------------------------|
| Co <sub>3</sub> S <sub>4</sub>                     | -270.41250    | -                       | 0%                          |
| Mg <sub>0.125</sub> Co <sub>3</sub> S <sub>4</sub> | -275.71632    | -1.08                   | 0.76%                       |
| Mg <sub>0.625</sub> Co <sub>3</sub> S <sub>4</sub> | -284.41889    | -1.29                   | 5.52%                       |
| MgCo <sub>3</sub> S <sub>4</sub>                   | -303.43320    | -2.62                   | 18.98%                      |
| Mg <sub>1.25</sub> Co <sub>3</sub> S <sub>4</sub>  | -315.52613    | -3.01                   | 23.19%                      |
| Mg <sub>2</sub> Co <sub>3</sub> S <sub>4</sub>     | -332.09019    | -2.23                   | 36.95%                      |

**Table S7** Energies, Formation energy and Volumetric expansion ratios of Mg<sub>x</sub>Ni<sub>3</sub>S<sub>4</sub> at different Mg concentrations.

| Molecular formula                                  | Energies (eV) | Formation energy (eV) | Volumetric expansion ratios |
|----------------------------------------------------|---------------|-----------------------|-----------------------------|
| Ni <sub>3</sub> S <sub>4</sub>                     | -236.00625    | -                     | 0%                          |
| Mg <sub>0.125</sub> Ni <sub>3</sub> S <sub>4</sub> | -239.56708    | -2.06                 | 6.82%                       |
| Mg <sub>0.625</sub> Ni <sub>3</sub> S <sub>4</sub> | -257.06390    | -2.71                 | 15.58%                      |
| MgNi <sub>3</sub> S <sub>4</sub>                   | -271.56967    | -2.94                 | 20.72%                      |
| Mg <sub>1.25</sub> Ni <sub>3</sub> S <sub>4</sub>  | -280.75009    | -2.97                 | 23.6%                       |
| Mg <sub>2</sub> Ni <sub>3</sub> S <sub>4</sub>     | -293.666378   | -2.10                 | 35.02%                      |

**Table S8** Lattice parameters of Mg<sub>x</sub>Co<sub>3</sub>S<sub>4</sub> at different Mg concentrations.

| Molecular formula                                  | a(Å)   | b(Å)   | c(Å)   | $\alpha$ | $\beta$ | $\gamma$ | V(Å <sup>3</sup> ) |
|----------------------------------------------------|--------|--------|--------|----------|---------|----------|--------------------|
| Co <sub>3</sub> S <sub>4</sub>                     | 9.501  | 9.501  | 9.501  | 90.0°    | 90.0°   | 90.0°    | 857.844            |
| Mg <sub>0.125</sub> Co <sub>3</sub> S <sub>4</sub> | 9.526  | 9.526  | 9.526  | 90.0°    | 90.0°   | 90.0°    | 864.354            |
| Mg <sub>0.625</sub> Co <sub>3</sub> S <sub>4</sub> | 9.500  | 9.858  | 9.692  | 86.6°    | 91.2°   | 81.7°    | 905.195            |
| MgCo <sub>3</sub> S <sub>4</sub>                   | 10.036 | 10.106 | 10.067 | 89.3°    | 90.5°   | 91.6°    | 1020.723           |
| Mg <sub>1.25</sub> Co <sub>3</sub> S <sub>4</sub>  | 10.081 | 10.229 | 10.247 | 89.5     | 90.2    | 90.1     | 1056.731           |
| Mg <sub>2</sub> Co <sub>3</sub> S <sub>4</sub>     | 11.191 | 11.229 | 9.356  | 89.7°    | 88.7°   | 88.0°    | 1174.798           |
| Mg <sub>3</sub> Co <sub>3</sub> S <sub>4</sub>     | 10.877 | 10.877 | 10.877 | 90       | 90      | 90       | 1287.043           |



**Table S9** Lattice parameters of  $Mg_xNi_3S_4$  at different Mg concentrations.

| Molecular formula   | a(Å)   | b(Å)   | c(Å)   | $\alpha$ | $\beta$ | $\gamma$ | $V(\text{Å}^3)$ |
|---------------------|--------|--------|--------|----------|---------|----------|-----------------|
| $Ni_3S_4$           | 9.330  | 9.330  | 9.330  | 90°      | 90°     | 90°      | 812.292         |
| $Mg_{0.125}Ni_3S_4$ | 9.539  | 9.539  | 9.539  | 90°      | 90°     | 90°      | 867.719         |
| $Mg_{0.625}Ni_3S_4$ | 9.777  | 9.806  | 9.800  | 88.9°    | 91.4°   | 91.3°    | 905.195         |
| $MgNi_3S_4$         | 9.952  | 9.948  | 0.906  | 88.7°    | 90°     | 90.3°    | 980.562         |
| $Mg_{1.25}Ni_3S_4$  | 9.970  | 10.038 | 10.033 | 89.9     | 90      | 89.9     | 1004.229        |
| $Mg_2Ni_3S_4$       | 11.083 | 10.256 | 9.376  | 89.3°    | 88.9°   | 88.2°    | 1096.757        |
| $Mg_3Ni_3S_4$       | 10.835 | 10.835 | 10.835 | 90       | 90      | 90       | 1272.221        |

**Table S10** Specific capacities and Energy densities of  $Mg_xM_3S_4$  at different Mg concentrations.

| Systems                                 | $Co_3S_4$ | $Mg_{0.125}Co_3S_4$ | $Mg_{0.625}Co_3S_4$ | $MgCo_3S_4$ | $Mg_{1.25}Co_3S_4$ | $Mg_2Co_3S_4$ | $Mg_3Co_3S_4$ |
|-----------------------------------------|-----------|---------------------|---------------------|-------------|--------------------|---------------|---------------|
| Specific capacity/mAh • g <sup>-1</sup> | 702.80    | 21.96               | 109.83              | 175.72      | 219.66             | 351.45        | 527.18        |
| Energy density/Wh • kg <sup>-1</sup>    | -         | 32.94               | 164.74              | 263.59      | 329.49             | 221.41        | 332.12        |

**Table S11** Specific capacities and Energy densities of  $Mg_xM_3S_4$  at different Mg concentrations.

| Systems                                 | $Ni_3S_4$ | $Mg_{0.125}Ni_3S_4$ | $Mg_{0.625}Ni_3S_4$ | $MgNi_3S_4$ | $Mg_{1.25}Ni_3S_4$ | $Mg_2Ni_3S_4$ | $Mg_3Ni_3S_4$ |
|-----------------------------------------|-----------|---------------------|---------------------|-------------|--------------------|---------------|---------------|
| Specific capacity/mAh • g <sup>-1</sup> | 704.50    | 22.01               | 110.41              | 176.66      | 220.83             | 353.33        | 538.43        |
| Energy density/Wh • kg <sup>-1</sup>    | -         | 35.23               | 176.66              | 282.66      | 353.33             | 247.33        | 369.90        |

**Table S12** Comparison of Mg diffusion barriers in spinel sulfides.

| Molecular formula                | Migration paths            | Diffusion Barrier (eV) |
|----------------------------------|----------------------------|------------------------|
| $Cr_2S_4$ <sup>1</sup>           | 8a-16c-8a                  | 0.542                  |
| $MgSn_2S_4$ <sup>2</sup>         | 8a-16c-8a                  | 0.590                  |
| $Ti_2S_4$ <sup>1</sup>           | 16c-8a-16c                 | 0.615                  |
| $Mn_2S_4$ <sup>1</sup>           | 16c-8a-16c                 | 0.515                  |
| $TiS_2$ <sup>3</sup>             | 16c-8a-16c                 | 0.700                  |
| $NiS_2$ <sup>3</sup>             | 16c-8a-16c                 | 0.460                  |
| $Co_3S_4$ <sup>[This work]</sup> | <b>16c-48f-16c</b>         | <b>1.100</b>           |
| $Ni_3S_4$ <sup>[This work]</sup> | <b>16c-48f-16c-48f-16c</b> | <b>0.670</b>           |

**Table S13** Average Bader charge values of Mg, Co and S for  $\text{Mg}_x\text{Co}_3\text{S}_4$  ( $0 \leq x \leq 2$ ).

| Molecular formula                        | Mg ( $e^-$ ) | Co ( $e^-$ ) | S ( $e^-$ ) |
|------------------------------------------|--------------|--------------|-------------|
| $\text{Co}_3\text{S}_4$                  | -            | 0.70         | -0.52       |
| $\text{Mg}_{0.125}\text{Co}_3\text{S}_4$ | 1.57         | 0.64         | -0.53       |
| $\text{Mg}_{0.625}\text{Co}_3\text{S}_4$ | 1.57         | 0.59         | -0.69       |
| $\text{MgCo}_3\text{S}_4$                | 1.60         | 0.81         | -1.01       |
| $\text{Mg}_{1.25}\text{Co}_3\text{S}_4$  | 1.60         | 0.84         | -1.13       |
| $\text{Mg}_2\text{Co}_3\text{S}_4$       | 1.60         | 0.56         | -1.22       |
| $\text{Mg}_3\text{Co}_3\text{S}_4$       | 1.54         | -0.04        | -1.12       |

**Table S14** Average Bader charge values of Mg, Ni and S for  $\text{Mg}_x\text{Ni}_3\text{S}_4$  ( $0 \leq x \leq 2$ ).

| Molecular formula                        | Mg ( $e^-$ ) | Ni ( $e^-$ ) | S ( $e^-$ ) |
|------------------------------------------|--------------|--------------|-------------|
| $\text{Ni}_3\text{S}_4$                  | -            | 0.50         | -0.38       |
| $\text{Mg}_{0.125}\text{Ni}_3\text{S}_4$ | 1.56         | 0.53         | -0.44       |
| $\text{Mg}_{0.625}\text{Ni}_3\text{S}_4$ | 1.58         | 0.64         | -0.73       |
| $\text{MgNi}_3\text{S}_4$                | 1.58         | 0.51         | -0.78       |
| $\text{Mg}_{1.25}\text{Ni}_3\text{S}_4$  | 1.59         | 0.71         | -1.03       |
| $\text{Mg}_2\text{Ni}_3\text{S}_4$       | 1.58         | 0.30         | -1.02       |
| $\text{Mg}_3\text{Ni}_3\text{S}_4$       | 1.58         | 0.04         | -1.22       |

**Table S15** Bader charge values of  $\text{Mg}_x\text{Co}_3\text{S}_4$  per atom.

| Atoms      | $\text{Co}_3\text{S}_4$ ( $e^-$ ) | $\text{Mg}_{0.125}\text{Co}_3\text{S}_4$ ( $e^-$ ) | $\text{Mg}_{0.625}\text{Co}_3\text{S}_4$ ( $e^-$ ) | $\text{MgCo}_3\text{S}_4$ ( $e^-$ ) | $\text{Mg}_{1.25}\text{Co}_3\text{S}_4$ ( $e^-$ ) | $\text{Mg}_2\text{Co}_3\text{S}_4$ ( $e^-$ ) | $\text{Mg}_3\text{Co}_3\text{S}_4$ ( $e^-$ ) |
|------------|-----------------------------------|----------------------------------------------------|----------------------------------------------------|-------------------------------------|---------------------------------------------------|----------------------------------------------|----------------------------------------------|
| <b>Co1</b> | 0.83084                           | 0.84267                                            | 0.50767                                            | 0.90663                             | 0.88375                                           | 0.44776                                      | -0.08895                                     |
| <b>Co2</b> | 0.83084                           | 0.84267                                            | 0.50786                                            | 0.84524                             | 0.37558                                           | 0.54915                                      | 0.11218                                      |
| <b>Co3</b> | 0.83084                           | 0.47256                                            | 0.41844                                            | 0.89367                             | 0.88328                                           | 0.38038                                      | 0.12158                                      |
| <b>Co4</b> | 0.83084                           | 0.84267                                            | 0.57046                                            | 0.85173                             | 0.56583                                           | 0.43132                                      | -0.04071                                     |
| <b>Co5</b> | 0.83084                           | 0.84267                                            | 0.53174                                            | 0.46712                             | 0.89554                                           | 0.49758                                      | -0.05500                                     |
| <b>Co6</b> | 0.83084                           | 0.84267                                            | 0.50983                                            | 0.51189                             | 0.37977                                           | 0.39238                                      | -0.39005                                     |
| <b>Co7</b> | 0.83084                           | 0.47256                                            | 0.5041                                             | 0.46903                             | 0.93093                                           | 0.07766                                      | -0.13993                                     |
| <b>Co8</b> | 0.83084                           | 0.84267                                            | 0.41928                                            | 0.50607                             | 0.48038                                           | 0.21751                                      | 0.03679                                      |
| <b>Co9</b> | 0.63603                           | 0.53437                                            | 0.612                                              | 0.76958                             | 0.94548                                           | 0.51624                                      | -0.32063                                     |

---

|             |          |          |          |          |          |          |          |
|-------------|----------|----------|----------|----------|----------|----------|----------|
| <b>Co10</b> | 0.63288  | 0.53437  | 0.66386  | 0.93145  | 0.85707  | 0.82392  | -0.00845 |
| <b>Co11</b> | 0.63288  | 0.47622  | 0.64125  | 0.91487  | 0.92533  | 0.72696  | 0.02616  |
| <b>Co12</b> | 0.63288  | 0.53437  | 0.67752  | 0.94061  | 0.94339  | 0.95181  | -0.29967 |
| <b>Co13</b> | 0.63288  | 0.67871  | 0.6663   | 0.93678  | 0.89154  | 0.27845  | 0.37344  |
| <b>Co14</b> | 0.63288  | 0.53617  | 0.62     | 0.93867  | 0.93184  | 0.48066  | 0.14327  |
| <b>Co15</b> | 0.63288  | 0.67871  | 0.66712  | 0.93000  | 0.91474  | 0.31761  | -0.01577 |
| <b>Co16</b> | 0.63128  | 0.67871  | 0.62053  | 0.93142  | 0.86496  | 0.25668  | 0.13480  |
| <b>Co17</b> | 0.63131  | 0.53437  | 0.69066  | 0.72760  | 0.92877  | 0.38019  | -0.26994 |
| <b>Co18</b> | 0.63603  | 0.53617  | 0.65345  | 0.93489  | 0.93076  | 0.93997  | 0.15977  |
| <b>Co19</b> | 0.63603  | 0.67871  | 0.68764  | 0.73673  | 0.97287  | 0.77422  | -0.24945 |
| <b>Co20</b> | 0.63131  | 0.53617  | 0.65944  | 0.73926  | 0.93752  | 0.94590  | -0.05538 |
| <b>Co21</b> | 0.63128  | 0.53437  | 0.61205  | 0.89493  | 0.91912  | 0.48093  | -0.19402 |
| <b>Co22</b> | 0.63131  | 0.67871  | 0.66089  | 0.94311  | 0.94622  | 0.80865  | -0.13668 |
| <b>Co23</b> | 0.63603  | 0.53437  | 0.66147  | 0.94587  | 0.91757  | 0.82747  | -0.02613 |
| <b>Co24</b> | 0.63131  | 0.67871  | 0.58606  | 0.77153  | 0.93545  | 0.93464  | 0.17802  |
| <b>S1</b>   | -0.52336 | -0.50737 | -0.71661 | -1.14164 | -1.15605 | -1.13096 | -1.3803  |
| <b>S2</b>   | -0.52336 | -0.50737 | -0.73981 | -0.97736 | -1.04491 | -1.2529  | -1.0906  |
| <b>S3</b>   | -0.52336 | -0.50798 | -0.89589 | -1.19313 | -1.13677 | -1.40938 | -0.97482 |
| <b>S4</b>   | -0.52336 | -0.50737 | -0.49762 | -0.70108 | -1.16117 | -1.12356 | -1.24622 |
| <b>S5</b>   | -0.52336 | -0.50737 | -0.7327  | -1.14506 | -1.27191 | -1.20055 | -1.19373 |
| <b>S6</b>   | -0.52808 | -0.50737 | -0.7041  | -0.83564 | -1.02715 | -1.16900 | -0.95423 |
| <b>S7</b>   | -0.52336 | -0.50798 | -0.74072 | -0.75811 | -1.17894 | -1.31961 | -1.10889 |
| <b>S8</b>   | -0.52336 | -0.50737 | -0.71223 | -1.02553 | -0.97078 | -1.02678 | -0.93060 |
| <b>S9</b>   | -0.52336 | -0.6444  | -0.71277 | -1.08703 | -1.15773 | -1.11734 | -1.29210 |
| <b>S10</b>  | -0.52336 | -0.5096  | -0.89914 | -1.17274 | -1.14708 | -1.04652 | -1.27207 |
| <b>S11</b>  | -0.52336 | -0.48424 | -0.50251 | -0.7733  | -1.17892 | -1.31428 | -0.82405 |
| <b>S12</b>  | -0.52336 | -0.48424 | -0.74425 | -1.02678 | -1.15024 | -1.31420 | -1.10755 |
| <b>S13</b>  | -0.52336 | -0.5096  | -0.69088 | -0.83106 | -1.0173  | -1.32468 | -1.20798 |
| <b>S14</b>  | -0.52336 | -0.6444  | -0.71542 | -1.18732 | -1.1518  | -1.29074 | -1.56905 |
| <b>S15</b>  | -0.52339 | -0.48424 | -0.68946 | -1.00134 | -0.97152 | -1.35032 | -0.77179 |
| <b>S16</b>  | -0.52493 | -0.50737 | -0.67818 | -1.18537 | -1.27038 | -1.27209 | -1.25655 |
| <b>S17</b>  | -0.52651 | -0.5096  | -0.69634 | -0.83556 | -1.25045 | -1.32728 | -0.82430 |

---



|             |   |   |   |   |   |   |         |
|-------------|---|---|---|---|---|---|---------|
| <b>Mg18</b> | - | - | - | - | - | - | 1.53839 |
| <b>Mg19</b> | - | - | - | - | - | - | 1.56600 |
| <b>Mg20</b> | - | - | - | - | - | - | 1.55701 |
| <b>Mg21</b> | - | - | - | - | - | - | 1.53693 |
| <b>Mg22</b> | - | - | - | - | - | - | 1.52339 |
| <b>Mg23</b> | - | - | - | - | - | - | 1.53022 |
| <b>Mg24</b> | - | - | - | - | - | - | 1.52779 |

**Table S16** Bader charge values of  $Mg_xNi_3S_4$  per atom.

| <b>Atoms</b> | <b>Ni<sub>3</sub>S<sub>4</sub> (e<sup>-</sup>)</b> | <b>Mg<sub>0.125</sub>Ni<sub>3</sub>S<sub>4</sub> (e<sup>-</sup>)</b> | <b>Mg<sub>0.625</sub>Ni<sub>3</sub>S<sub>4</sub> (e<sup>-</sup>)</b> | <b>MgNi<sub>3</sub>S<sub>4</sub> (e<sup>-</sup>)</b> | <b>Mg<sub>1.25</sub>Ni<sub>3</sub>S<sub>4</sub> (e<sup>-</sup>)</b> | <b>Mg<sub>2</sub>Ni<sub>3</sub>S<sub>4</sub> (e<sup>-</sup>)</b> | <b>Mg<sub>3</sub>Ni<sub>3</sub>S<sub>4</sub> (e<sup>-</sup>)</b> |
|--------------|----------------------------------------------------|----------------------------------------------------------------------|----------------------------------------------------------------------|------------------------------------------------------|---------------------------------------------------------------------|------------------------------------------------------------------|------------------------------------------------------------------|
| <b>Ni1</b>   | 0.45654                                            | 0.39292                                                              | 0.62747                                                              | 0.50068                                              | 0.82897                                                             | 0.18820                                                          | -0.13914                                                         |
| <b>Ni2</b>   | 0.45654                                            | 0.64179                                                              | 0.57945                                                              | 0.21657                                              | 0.76935                                                             | 0.09938                                                          | -0.02969                                                         |
| <b>Ni3</b>   | 0.45654                                            | 0.64179                                                              | 0.63681                                                              | 0.48724                                              | 0.22926                                                             | 0.04022                                                          | 0.07450                                                          |
| <b>Ni4</b>   | 0.45654                                            | 0.6354                                                               | 0.44397                                                              | 0.33240                                              | 0.26967                                                             | 0.01402                                                          | -0.05994                                                         |
| <b>Ni5</b>   | 0.45654                                            | 0.39292                                                              | 0.50111                                                              | 0.46886                                              | 0.38399                                                             | 0.21543                                                          | -0.02948                                                         |
| <b>Ni6</b>   | 0.45654                                            | 0.5548                                                               | 0.47867                                                              | 0.20902                                              | 0.78001                                                             | -0.02011                                                         | -0.12823                                                         |
| <b>Ni7</b>   | 0.45654                                            | 0.33984                                                              | 0.46896                                                              | 0.50652                                              | 0.27882                                                             | 0.46094                                                          | 0.02650                                                          |
| <b>Ni8</b>   | 0.45654                                            | 0.64179                                                              | 0.41702                                                              | 0.44179                                              | 0.75                                                                | 0.36238                                                          | -0.15108                                                         |
| <b>Ni9</b>   | 0.53066                                            | 0.5548                                                               | 0.76848                                                              | 0.51865                                              | 0.75359                                                             | 0.60937                                                          | 0.08506                                                          |
| <b>Ni10</b>  | 0.52778                                            | 0.6354                                                               | 0.61514                                                              | 0.56499                                              | 0.81897                                                             | 0.01371                                                          | 0.11889                                                          |
| <b>Ni11</b>  | 0.52778                                            | 0.33984                                                              | 0.72846                                                              | 0.61079                                              | 0.76289                                                             | 0.39451                                                          | 0.11303                                                          |
| <b>Ni12</b>  | 0.52778                                            | 0.64179                                                              | 0.71728                                                              | 0.50510                                              | 0.73147                                                             | 0.54179                                                          | 0.08481                                                          |
| <b>Ni13</b>  | 0.52778                                            | 0.39292                                                              | 0.66064                                                              | 0.57773                                              | 0.82449                                                             | 0.13614                                                          | 0.02311                                                          |
| <b>Ni14</b>  | 0.52778                                            | 0.5548                                                               | 0.5965                                                               | 0.62424                                              | 0.75115                                                             | 0.40701                                                          | 0.14300                                                          |
| <b>Ni15</b>  | 0.52778                                            | 0.64179                                                              | 0.78428                                                              | 0.56068                                              | 0.86127                                                             | 0.47218                                                          | 0.0706                                                           |
| <b>Ni16</b>  | 0.52632                                            | 0.6354                                                               | 0.58837                                                              | 0.52824                                              | 0.80884                                                             | 0.04571                                                          | 0.05273                                                          |
| <b>Ni17</b>  | 0.52635                                            | 0.39292                                                              | 0.70227                                                              | 0.60776                                              | 0.75881                                                             | 0.51849                                                          | 0.19893                                                          |
| <b>Ni18</b>  | 0.53066                                            | 0.64179                                                              | 0.68335                                                              | 0.59473                                              | 0.76429                                                             | 0.42383                                                          | -0.0037                                                          |
| <b>Ni19</b>  | 0.53066                                            | 0.39292                                                              | 0.7361                                                               | 0.61269                                              | 0.81391                                                             | 0.44167                                                          | -0.41092                                                         |
| <b>Ni20</b>  | 0.52632                                            | 0.5548                                                               | 0.69618                                                              | 0.60088                                              | 0.86952                                                             | 0.41886                                                          | 0.29024                                                          |
| <b>Ni21</b>  | 0.52632                                            | 0.5548                                                               | 0.7177                                                               | 0.57397                                              | 0.83291                                                             | 0.19900                                                          | 0.26303                                                          |

---

|             |          |          |          |          |          |          |          |
|-------------|----------|----------|----------|----------|----------|----------|----------|
| <b>Ni22</b> | 0.52635  | 0.53904  | 0.75151  | 0.59730  | 0.886    | 0.50269  | 0.06088  |
| <b>Ni23</b> | 0.53066  | 0.39292  | 0.71904  | 0.55330  | 0.76338  | 0.49431  | 0.37346  |
| <b>Ni24</b> | 0.52635  | 0.5548   | 0.77838  | 0.56537  | 0.7831   | 0.17010  | -0.01808 |
| <b>S1</b>   | -0.38164 | -0.36044 | -0.80954 | -0.70541 | -1.20881 | -0.71980 | -0.92496 |
| <b>S2</b>   | -0.37730 | -0.37269 | -1.03364 | -0.60749 | -1.10744 | -0.89407 | -0.92359 |
| <b>S3</b>   | -0.37730 | -0.36044 | -0.43924 | -0.94019 | -0.83599 | -1.22852 | -1.50537 |
| <b>S4</b>   | -0.37730 | -0.37269 | -0.4528  | -0.67246 | -0.80612 | -1.16925 | -1.41662 |
| <b>S5</b>   | -0.37730 | -0.46161 | -0.43918 | -0.91482 | -1.02248 | -1.01551 | -1.34148 |
| <b>S6</b>   | -0.37730 | -0.46161 | -0.76337 | -0.58867 | -1.10945 | -0.94723 | -0.94476 |
| <b>S7</b>   | -0.37730 | -0.37269 | -0.98838 | -0.96102 | -1.06866 | -1.35753 | -1.08782 |
| <b>S8</b>   | -0.37730 | -0.36044 | -0.53899 | -0.45594 | -0.99659 | -1.15009 | -1.32869 |
| <b>S9</b>   | -0.37730 | -0.70347 | -0.96715 | -0.92759 | -1.15694 | -0.90256 | -1.44547 |
| <b>S10</b>  | -0.37730 | -0.70347 | -0.67654 | -0.48193 | -1.07375 | -1.39486 | -1.17213 |
| <b>S11</b>  | -0.37730 | -0.70347 | -0.72647 | -0.93420 | -1.17717 | -0.64739 | -1.42738 |
| <b>S12</b>  | -0.37730 | -0.70347 | -0.70429 | -0.43849 | -1.06827 | -0.86283 | -1.20050 |
| <b>S13</b>  | -0.37730 | -0.33768 | -1.17922 | -0.80821 | -1.16946 | -1.05232 | -1.35871 |
| <b>S14</b>  | -0.37730 | -0.46161 | -0.53773 | -0.93455 | -1.08408 | -1.12188 | -0.94946 |
| <b>S15</b>  | -0.37733 | -0.36044 | -0.9847  | -0.58346 | -1.04987 | -1.30275 | -1.31989 |
| <b>S16</b>  | -0.37874 | -0.70347 | -0.70568 | -0.97569 | -1.06972 | -0.75252 | -0.87330 |
| <b>S17</b>  | -0.37874 | -0.36044 | -0.87386 | -0.69086 | -0.97429 | -0.79471 | -1.20697 |
| <b>S18</b>  | -0.38018 | -0.36044 | -0.85434 | -0.47441 | -0.96123 | -0.90267 | -1.25683 |
| <b>S19</b>  | -0.37874 | -0.36044 | -0.66877 | -0.94151 | -0.98114 | -0.93977 | -0.77126 |
| <b>S20</b>  | -0.37730 | -0.36044 | -0.6735  | -0.79273 | -1.07066 | -1.30661 | -0.81701 |
| <b>S21</b>  | -0.37733 | -0.46161 | -0.76436 | -0.60728 | -0.99321 | -1.24641 | -1.47820 |
| <b>S22</b>  | -0.38018 | -0.46161 | -0.75074 | -0.96942 | -1.02388 | -1.16271 | -1.34247 |
| <b>S23</b>  | -0.38018 | -0.36044 | -0.62407 | -0.90692 | -0.79892 | -0.71580 | -1.01957 |
| <b>S24</b>  | -0.37874 | -0.37269 | -0.72761 | -0.72309 | -1.03869 | -0.91872 | -1.58500 |
| <b>S25</b>  | -0.37730 | -0.37269 | -0.71842 | -0.57707 | -0.83969 | -0.95947 | -1.50884 |
| <b>S26</b>  | -0.37874 | -0.36044 | -0.56183 | -0.90692 | -1.05898 | -1.35809 | -1.1327  |
| <b>S27</b>  | -0.37874 | -0.37269 | -0.73402 | -1.10686 | -1.01952 | -1.08714 | -1.26206 |
| <b>S28</b>  | -0.3802  | -0.36044 | -0.74529 | -1.14612 | -1.01813 | -0.79343 | -0.95413 |
| <b>S29</b>  | -0.37730 | -0.46161 | -0.43823 | -0.79783 | -1.00556 | -1.05689 | -1.2014  |

---

---

|             |          |          |          |          |          |          |          |
|-------------|----------|----------|----------|----------|----------|----------|----------|
| <b>S30</b>  | -0.37730 | -0.33768 | -0.97867 | -0.79667 | -1.08953 | -1.13268 | -1.43673 |
| <b>S31</b>  | -0.37733 | -0.70347 | -0.49359 | -1.12212 | -0.99396 | -0.57906 | -1.39001 |
| <b>S32</b>  | -0.37874 | -0.36044 | -0.76417 | -0.49487 | -1.1433  | -1.00974 | -1.45622 |
| <b>Mg1</b>  | -        | 1.56525  | 1.58324  | 1.57332  | 1.59395  | 1.55444  | 1.55402  |
| <b>Mg2</b>  | -        | -        | 1.58723  | 1.57479  | 1.5944   | 1.59732  | 1.58452  |
| <b>Mg3</b>  | -        | -        | 1.58075  | 1.58109  | 1.58861  | 1.56400  | 1.59001  |
| <b>Mg4</b>  | -        | -        | 1.58812  | 1.58337  | 1.59496  | 1.59357  | 1.57041  |
| <b>Mg5</b>  | -        | -        | 1.58189  | 1.58034  | 1.59223  | 1.59851  | 1.57875  |
| <b>Mg6</b>  | -        | -        | -        | 1.57354  | 1.59669  | 1.57761  | 1.59737  |
| <b>Mg7</b>  | -        | -        | -        | 1.57643  | 1.59883  | 1.58803  | 1.58184  |
| <b>Mg8</b>  | -        | -        | -        | 1.58243  | 1.59477  | 1.56552  | 1.59123  |
| <b>Mg9</b>  | -        | -        | -        | -        | 1.59326  | 1.58393  | 1.54358  |
| <b>Mg10</b> | -        | -        | -        | -        | 1.59307  | 1.58632  | 1.59753  |
| <b>Mg11</b> | -        | -        | -        | -        | -        | 1.59351  | 1.57922  |
| <b>Mg12</b> | -        | -        | -        | -        | -        | 1.59646  | 1.58671  |
| <b>Mg13</b> | -        | -        | -        | -        | -        | 1.57750  | 1.60306  |
| <b>Mg14</b> | -        | -        | -        | -        | -        | 1.57209  | 1.58762  |
| <b>Mg15</b> | -        | -        | -        | -        | -        | 1.59188  | 1.58573  |
| <b>Mg16</b> | -        | -        | -        | -        | -        | 1.59249  | 1.59383  |
| <b>Mg17</b> | -        | -        | -        | -        | -        | -        | 1.56631  |
| <b>Mg18</b> | -        | -        | -        | -        | -        | -        | 1.58955  |
| <b>Mg19</b> | -        | -        | -        | -        | -        | -        | 1.60306  |
| <b>Mg20</b> | -        | -        | -        | -        | -        | -        | 1.58548  |
| <b>Mg21</b> | -        | -        | -        | -        | -        | -        | 1.58318  |
| <b>Mg22</b> | -        | -        | -        | -        | -        | -        | 1.60369  |
| <b>Mg23</b> | -        | -        | -        | -        | -        | -        | 1.56614  |
| <b>Mg24</b> | -        | -        | -        | -        | -        | -        | 1.60816  |

---

## References

- 1 M. Liu, A. Jain, Z. Rong, X. Qu, P. Canepa, R. Malik, G. Ceder and K. A. Persson, *Energ. Environ. Sci.*, 2016, **9**, 3201-3209.
- 2 J. Cai, Z. Wang, S. Wu, Y. Han and J. Li, *Energy Storage Mater.*, 2021, **42**, 277-285.
- 3 V. V. Kulish, D. Koch and S. Manzhos, *Phys. Chem. Chem. Phys.*, 2017, **19**, 6076-6081.
